# Supplementary material for: Color-tunable and single-band red upconversion luminescence from rare-earth doped Vernier phase ytterbium oxyfluoride nanoparticles
Source: Royal Society of Chemistry journal article supplement (doi:10.1039/c5tc02577j), 2015-11-13
Supplement: c5tc02577j1.pdf [file c5tc02577j1.pdf]

*Supporting Information for:*

## **Color-Tunable and Single-Band Red Upconversion Luminescence from Rare-Earth Doped Vernier Phase Ytterbium Oxyfluoride Nanoparticles**

*Ting Wen, Yannan Zhou, Yanzhen Guo, Chunmei Zhao, Baocheng Yang and Yonggang Wang\**

Institute of Nanostructured Functional Materials, Huanghe Science and Technology College, Zhengzhou, Henan 450006, China

### ***Supporting figures:***

**Figure S1.** Schematic representation of Yb-Yb distances in the Yb sublattice in *V*-YbOF exhibiting 2D layered structural feature.

**Figure S2.** CIE chromaticity diagram of UC PL from *V*-YbOF:Ho (0.2-6 mol%) nanoparticles under 980 nm irradiation.

### ***Supporting tables:***

**Table S1.** EDX results of individual undoped *V*-YbOF particles.

**Table S2.** Refined crystal structure of Vernier phase  $\text{Yb}_6\text{O}_5\text{F}_8$  from powder X-ray diffraction data at room temperature.

**Table S3.** Measured lifetimes of the green and red UC emissions for  $x\%\text{Ho}^{3+}$  doped *V*-YbOF ( $x = 0.5, 1, 2, 5$ ).

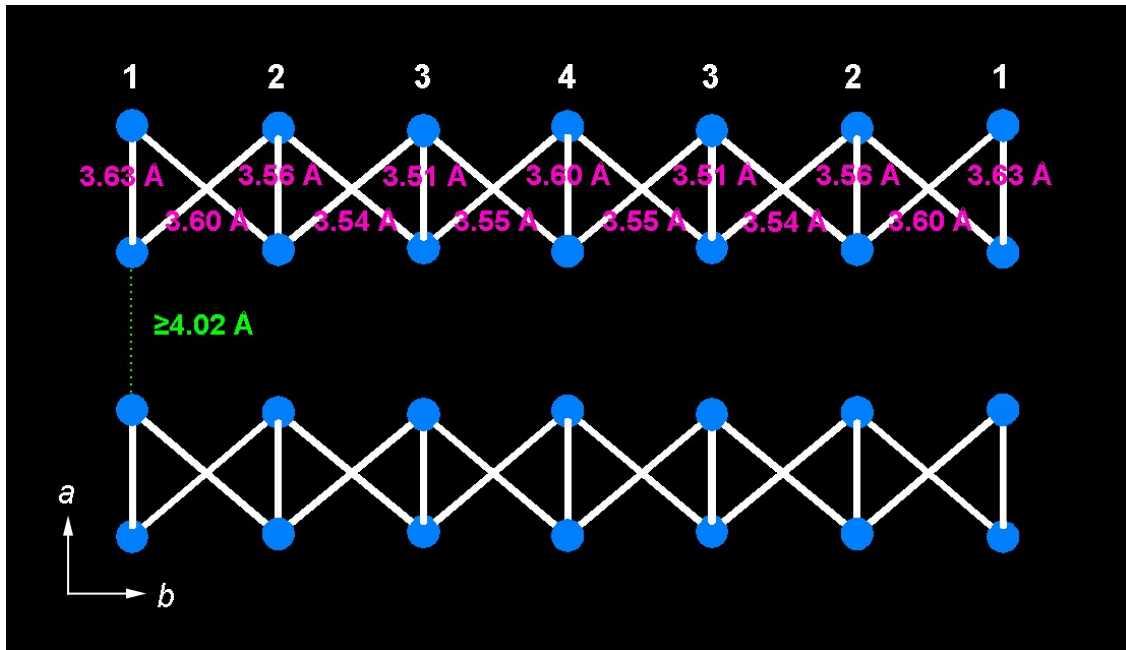

**Figure S1.** Schematic representation of Yb-Yb distances in the Yb sublattice in  $V$ -YbOF exhibiting 2D layered structural feature.

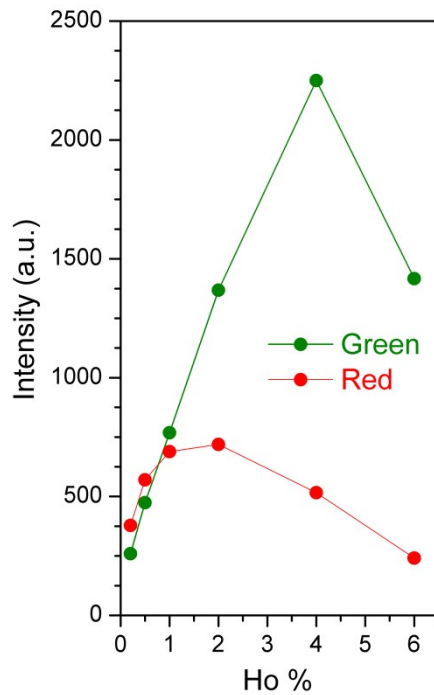

**Figure S2.** UC PL intensities of the two peaks of  $\text{Ho}^{3+}$ -doped  $V$ -YbOF as a function of the  $\text{Ho}^{3+}$  doping concentration.

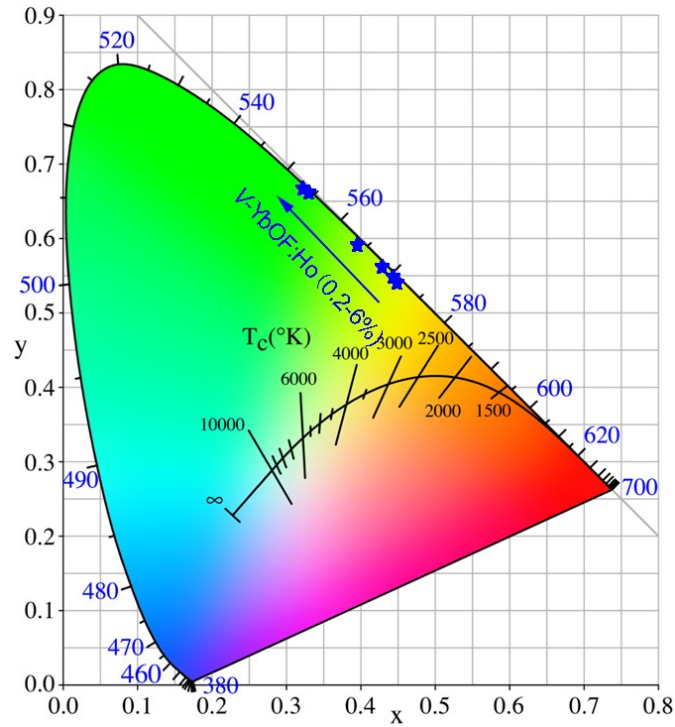

**Figure S3.** CIE chromaticity diagram of UC PL from *V*-YbOF:Ho (0.2-6 mol%) nanoparticles under 980 nm irradiation.

**Table S1.** EDX results of individual undoped *V*-YbOF particles.

| Particles | 1           | 2           | 3           | 4           | 5           | 6           | 7           | 8           | average     |
|-----------|-------------|-------------|-------------|-------------|-------------|-------------|-------------|-------------|-------------|
| Yb/O/F    | 1.15/1/1.78 | 1.17/1/1.58 | 1.24/1/1.71 | 1.26/1/1.63 | 1.13/1/1.74 | 1.14/1/1.58 | 1.21/1/1.62 | 1.13/1/1.72 | 1.18/1/1.67 |

**Table S2.** Refined crystal structure of Vernier phase  $\text{Yb}_6\text{O}_5\text{F}_8$  from powder X-ray diffraction data at room temperature.<sup>a</sup>

| Atom | Site | x       | y       | z       | Occ. | BVS   |
|------|------|---------|---------|---------|------|-------|
| Yb1  | 4c   | 0.69434 | 0.00000 | 0.25000 | 1    | +2.85 |
| Yb2  | 8e   | 0.28382 | 0.08387 | 0.28268 | 1    | +2.81 |
| Yb3  | 8e   | 0.71056 | 0.16358 | 0.23121 | 1    | +2.75 |
| Yb4  | 4c   | 0.28908 | 0.25000 | 0.29836 | 1    | +2.79 |
| O1   | 8e   | 0.42560 | 0.04754 | 0.04139 | 1    |       |
| O2   | 8e   | 0.51792 | 0.12288 | 0.47124 | 1    |       |
| O3   | 8e   | 0.49454 | 0.20387 | 0.00112 | 0.5  |       |
| F1   | 8e   | 0.49454 | 0.20387 | 0.00112 | 0.5  |       |
| F2   | 8e   | 0.00605 | 0.03542 | 0.41742 | 1    |       |
| F3   | 8e   | 0.93895 | 0.10649 | 0.11570 | 1    |       |
| F4   | 8e   | 0.09279 | 0.17882 | 0.34194 | 1    |       |
| F5   | 4c   | 0.18913 | 0.25000 | 0.17351 | 1    |       |

<sup>a</sup>Space group: *Pcmb*,  $a = 5.3323(7)$  Å,  $b = 6 \times 5.4581(5)$  Å, and  $c = 5.4676(8)$  Å,  $R_p = 3.98\%$ ,  $R_{wp} = 5.32\%$ .

**Table S3.** Measured lifetimes of the green and red UC emissions for  $x\% \text{Ho}^{3+}$  doped  $V\text{-YbOF}$  ( $x = 0.5, 1, 2, 4$ ).

| $x$ in $x\% \text{Ho:V-YbOF}$ | 0.5%              | 1.0%              | 2.0%              | 4.0%               |
|-------------------------------|-------------------|-------------------|-------------------|--------------------|
| 545 nm                        | 4.8 $\mu\text{s}$ | 5.4 $\mu\text{s}$ | 5.6 $\mu\text{s}$ | 7.2 $\mu\text{s}$  |
| 660 nm                        | 5.4 $\mu\text{s}$ | 6.3 $\mu\text{s}$ | 6.8 $\mu\text{s}$ | 11.5 $\mu\text{s}$ |
